# Supplementary material
Source: PubMed Central journal article supplement (PMC3037746)

**Table S1. Patient characteristics of the 26 AML cases over-expressing *EVII****Abbreviations*; FAB; French-American British classification, WBC; white blood cell count in 10<sup>9</sup>/L.

| Patient | Age | Gender | FAB | WBC  | HOVON | Karyotype                                                             |
|---------|-----|--------|-----|------|-------|-----------------------------------------------------------------------|
| 3102    | NA  | M      | M2  | 15   | NA    | 45,XY,-7[33]/46,XY[8]                                                 |
| 2186    | 40  | M      | M5  | 16.1 | HO04  | 45,XY,-7,t(7;8)(q22;p11)[21]                                          |
| 2250    | 19  | M      | M1  | 9.8  | HO29  | 46,XY,-7,ish add(12)(p13),(wcp12-),+r[13]/46,XY[15]                   |
| 2276    | 57  | F      | M0  | 35.3 | HO29  | 46,XX,t(1;6)(p32;q24or25),del(2)(q34)[33]46,XX[1],<br>inv(3)(q21q26)* |
| 2327    | 54  | F      | M2  | 29.8 | HO04  | 46,XX,del(7)(q22)[41],46,XX[1]                                        |
| 2207    | 31  | M      | M1  | 96   | HO04  | 46,XY,t(6;11)(q25;q23)                                                |
| 2288    | 31  | M      | M4  | 17.4 | HO29  | 45,XY,-7,t(9;11)(p21;q23)[33]                                         |
| 2664    | 34  | M      | M0  | 173  | HO29  | 45,XY,inv(3)(q12q26.2),-7                                             |
| 2666    | 36  | M      | M5  | 23   | HO29  | NA                                                                    |
| 6238    | 30  | F      | M4  | 4.5  | HO42  | 46,XX,t(6;11)(q27;q23)[28]                                            |
| 5288    | 65  | M      | M2  | 25   | HO43  | 45,XY,inv(3)(q21q26)*,-7[16]/46,XY[9]                                 |
| 5291    | 67  | M      | Mx  | 25   | HO43  | 53,XY,+6,+8,+9,t(11;16)(q23;p13),+13,+14,+19,+21                      |
| 5351    | 67  | F      | M4  | 122  | HO43  | 46,XX,t(6;11)(q27;q23)[36]                                            |
| 5354    | 72  | M      | M9  | 54   | HO43  | 46,XY,t(3;21)(q26;q22),del(12)(p12p13)[20]                            |
| 6357    | 61  | M      | M1  | 19.7 | HO43  | 45,XY,inv(3)(q21q26)*,-7[16]/46,XY[8]                                 |
| 7072    | 61  | M      | M4  | 23.5 | HO42  | 46,XY,?11(q2?)[3]/46,XY[18] ish t(9;11)(p22;q23)                      |
| 7084    | 65  | F      | M4  | 24.9 | HO43  | NA                                                                    |
| 7306    | 51  | M      | M5  | 33   | HO42  | 46,XY,t(11;19)(q23;p13.1)[15]/46,XY[5]                                |
| 7416    | 56  | M      | M4  | 20.7 | HO42  | 48,XY,+9,+21[9]/49,XY,+9,+21,+21[14]                                  |
| 6945    | 33  | M      | M4  | 90   | HO04  | 46,XY/47,XY,+?8[2]/48,XY,+mar1,+mar2[28]                              |
| 3328    | 41  | F      | M5  | 25   | HO42  | 46,XX,t(11;19)(q23;p13)[21]                                           |
| 7136    | 69  | M      | M6  | 11   | HO43  | 45,XY,t(3;3)(q21;q26),-7                                              |
| 2228    | 41  | F      | M4  | 38   | HO29  | 46,XX[66],inv(3)(q21q26)*                                             |
| 2326    | 31  | M      | M2  | 94   | HO29  | 46,XY,t(9;22)(q34;q11)[22]                                            |
| 2190    | 16  | M      | M5  | 54.7 | HO04  | 45,XY,inv(3)(q22q26),-7[25]                                           |
| 2747    | 23  | F      | M5  | 44.8 | HO29  | 45,XX,inv(3)(q2?1q26),-7[31]/46,XX[1]                                 |

**Table S2. The 294 differentially methylated genes in *EVII* AML compared to CD34+ normal bone marrow (NBM) (303 probe sets)**

The genes are ranked on chromosome location. Methylation difference ( $\text{mean}^{\text{EVII}} \log(\text{HpaII/MspI}) - \text{mean}^{\text{NBM}} \log(\text{HpaII/MspI})$  ratio), moderated T-test P-value comparing both groups (BH correct  $P < 0.05$ ). The previously described tumor suppressor genes are colored in red.

| HELP probe sets   | Chr  | RefSeq ID               | Gene Symbol     | P-value | Meth Diff | Mean EVII | Mean NBM |
|-------------------|------|-------------------------|-----------------|---------|-----------|-----------|----------|
| MSPI0406S00011571 | chr1 | NM_138346               | KIAA2013        | 0.0000  | 2.13      | 2.04      | -0.08    |
| MSPI0406S00020478 | chr1 | NM_001102398, NM_005826 | HNRPR, HNRNPR   | 0.0000  | -1.76     | -1.26     | 0.50     |
| MSPI0406S00028118 | chr1 |                         |                 | 0.0000  | -2.12     | -0.11     | 2.01     |
| MSPI0406S00032481 | chr1 | NM_001905               | CTPS            | 0.0000  | -1.58     | 0.44      | 2.01     |
| MSPI0406S00033467 | chr1 | NM_006824, NM_152498    | EBNA1BP2, WDR65 | 0.0001  | -1.85     | 0.90      | 2.75     |
| MSPI0406S00033551 | chr1 | NM_005424               | TIE1            | 0.0000  | -1.79     | 0.64      | 2.42     |
| MSPI0406S00035767 | chr1 | NM_178033               | CYP4X1          | 0.0001  | -1.83     | -0.43     | 1.40     |
| MSPI0406S00035977 | chr1 | NM_004474               | FOXD2           | 0.0006  | -1.52     | 0.41      | 1.94     |
| MSPI0406S00047441 | chr1 | NM_014839               | LPPR4           | 0.0000  | -1.88     | -1.32     | 0.56     |
| MSPI0406S00054201 | chr1 | NM_181873               | MTMR11          | 0.0002  | 1.63      | 2.23      | 0.60     |
| MSPI0406S00054412 | chr1 | NM_144697               | C1orf51         | 0.0008  | -1.76     | 1.22      | 2.98     |
| MSPI0406S00054495 | chr1 | NM_015203               | KIAA0460        | 0.0002  | -2.25     | -0.23     | 2.01     |
| MSPI0406S00055568 | chr1 | NM_016178, NM_031420    | OAZ3, MRPL9     | 0.0000  | -2.11     | -0.51     | 1.59     |
| MSPI0406S00055659 | chr1 | NM_053055               | THEM4           | 0.0000  | -2.96     | -0.32     | 2.63     |
| MSPI0406S00055835 | chr1 | NM_178435               | LCE3E           | 0.0002  | 2.12      | 0.87      | -1.24    |
| MSPI0406S00055975 | chr1 | NM_002965               | S100A9          | 0.0006  | 1.59      | 0.90      | -0.69    |
| MSPI0406S00059603 | chr1 | NM_004833               | AIM2            | 0.0009  | 2.27      | 0.44      | -1.83    |
| MSPI0406S00059781 | chr1 | NM_012337               | CCDC19          | 0.0000  | -2.12     | 0.15      | 2.28     |
| MSPI0406S00059782 | chr1 | NM_012337               | CCDC19          | 0.0001  | -2.06     | 0.52      | 2.58     |
| MSPI0406S00060117 | chr1 | NM_001778               | CD48            | 0.0009  | 1.65      | 0.77      | -0.88    |
| MSPI0406S00062872 | chr1 | NM_015569               | DNM3            | 0.0000  | -2.49     | 0.70      | 3.18     |
| MSPI0406S00068091 | chr1 | NM_012482               | ZNF281          | 0.0000  | -2.86     | -0.61     | 2.25     |
| MSPI0406S00069595 | chr1 | NM_006618               | JARID1B         | 0.0000  | -2.02     | -0.17     | 1.85     |
| MSPI0406S00074411 | chr1 | NM_005401               | PTPN14          | 0.0000  | -1.91     | 0.33      | 2.24     |
| MSPI0406S00099987 | chr2 | NM_173853               | KRTCAP3         | 0.0000  | -1.60     | -0.31     | 1.29     |
| MSPI0406S00103855 | chr2 | BC030087                | LOC375196       | 0.0000  | -1.70     | 0.79      | 2.49     |
| MSPI0406S00103856 | chr2 | BC030087                | LOC375196       | 0.0000  | -1.66     | -0.94     | 0.73     |
| MSPI0406S00105608 | chr2 | NM_024766, NM_001042386 | C2orf34, PREPL  | 0.0000  | -2.14     | -1.80     | 0.35     |
| MSPI0406S00107352 | chr2 | NM_000233               | LHCGR           | 0.0009  | -1.74     | -0.81     | 0.93     |
| MSPI0406S00108560 | chr2 | NM_033109               | PNPT1           | 0.0007  | -1.61     | -0.45     | 1.16     |
| MSPI0406S00114344 | chr2 | NM_001009812            | LBX2            | 0.0000  | -1.84     | 0.68      | 2.52     |
| MSPI0406S00116274 | chr2 | NM_006634               | VAMP5           | 0.0000  | -1.55     | 0.53      | 2.09     |
| MSPI0406S00128707 | chr2 | NM_014553               | TFCP2L1         | 0.0000  | 1.92      | 1.54      | -0.38    |
| MSPI0406S00130817 | chr2 | NM_004807               | LOC728969       | 0.0001  | -1.94     | 0.63      | 2.56     |
| MSPI0406S00133531 | chr2 | NM_012233               | RAB3GAP1        | 0.0004  | 1.52      | -0.38     | -1.90    |
| MSPI0406S00140656 | chr2 | NM_000079               | CHRNA1          | 0.0008  | 1.78      | -0.57     | -2.36    |
| MSPI0406S00145599 | chr2 | NM_138468               | ICA1L           | 0.0005  | -1.72     | -0.09     | 1.63     |
| MSPI0406S00146431 | chr2 | N25995                  | NRP2            | 0.0000  | -2.97     | -1.67     | 1.30     |
| MSPI0406S00156924 | chr2 | NM_001485               | GBX2            | 0.0000  | 1.85      | 3.31      | 1.46     |
| MSPI0406S00161233 | chr2 | NM_014808               | FARP2           | 0.0000  | -1.94     | 0.50      | 2.44     |
| MSPI0406S00166143 | chr3 | NM_025265               | TSEN2           | 0.0001  | 1.54      | 1.53      | -0.01    |

| HELP probe sets   | Chr  | RefSeq ID            | Gene Symbol        | P-value | Meth Diff | Mean EVI1 | Mean NBM |
|-------------------|------|----------------------|--------------------|---------|-----------|-----------|----------|
| MSPI0406S00174112 | chr3 | NM_207404            | ZNF662             | 0.0000  | -1.87     | -1.43     | 0.43     |
| MSPI0406S00178801 | chr3 | NM_145071            | CISH               | 0.0001  | -2.26     | 0.86      | 3.11     |
| MSPI0406S00184632 | chr3 | NM_001005527         | FAM19A4            | 0.0001  | -1.74     | 0.01      | 1.75     |
| MSPI0406S00191987 | chr3 | NM_033364            | C3orf15            | 0.0005  | -1.53     | 1.12      | 2.65     |
| MSPI0406S00192187 | chr3 | NM_007085            | FSTL1              | 0.0001  | -1.85     | 0.09      | 1.94     |
| MSPI0406S00196108 | chr3 | NM_020741            | KIAA1257           | 0.0002  | -1.66     | 0.58      | 2.24     |
| MSPI0406S00196163 | chr3 | NM_000174            | GP9                | 0.0000  | -1.73     | -1.14     | 0.58     |
| MSPI0406S00196352 | chr3 | NM_020187            | C3orf37            | 0.0000  | -1.78     | 0.34      | 2.13     |
| MSPI0406S00197620 | chr3 | NM_021203            | SRPRB              | 0.0006  | -1.51     | -0.80     | 0.71     |
| MSPI0406S00197824 | chr3 | NM_001005861         | RYK                | 0.0000  | 1.68      | 1.19      | -0.49    |
| MSPI0406S00201342 | chr3 | NM_002628            | PFN2               | 0.0000  | -2.40     | -0.85     | 1.55     |
| MSPI0406S00202811 | chr3 | NM_001099777         | C3orf55            | 0.0001  | -1.69     | 0.69      | 2.38     |
| MSPI0406S00208333 | chr3 | NM_144635            | FAM131A            | 0.0000  | -1.68     | -1.19     | 0.48     |
| MSPI0406S00213790 | chr3 | NM_025163            | PIGZ               | 0.0000  | -2.37     | -1.74     | 0.63     |
| MSPI0406S00213791 | chr3 | NM_025163            | PIGZ               | 0.0000  | -3.20     | -1.65     | 1.55     |
| MSPI0406S00218942 | chr4 | NM_016930            | STX18              | 0.0001  | -1.77     | 1.58      | 3.35     |
| MSPI0406S00220627 | chr4 | NM_153376, NM_152293 | CCDC96, MGC21874   | 0.0000  | -2.04     | -1.15     | 0.89     |
| MSPI0406S00224622 | chr4 | AB033102             | KIAA1276           | 0.0003  | 3.07      | 0.76      | -2.31    |
| MSPI0406S00239258 | chr4 | NM_005908            | MANBA              | 0.0000  | -1.70     | -0.70     | 1.00     |
| MSPI0406S00239368 | chr4 | NM_001059            | TACR3              | 0.0001  | 1.85      | 0.50      | -1.35    |
| MSPI0406S00240343 | chr4 | NM_024090            | ELOVL6             | 0.0008  | 1.76      | 2.10      | 0.33     |
| MSPI0406S00245845 | chr4 | NM_004575            | POU4F2             | 0.0000  | 1.76      | 2.46      | 0.71     |
| MSPI0406S00247238 | chr4 | NM_015271            | TRIM2              | 0.0003  | -1.62     | -1.56     | 0.06     |
| MSPI0406S00247456 | chr4 | NM_003264            | TLR2               | 0.0002  | -2.13     | 0.03      | 2.16     |
| MSPI0406S00247772 | chr4 | NM_000857            | GUCY1B3            | 0.0000  | -2.06     | -0.54     | 1.52     |
| MSPI0406S00265126 | chr5 |                      |                    | 0.0000  | -2.58     | -1.07     | 1.52     |
| MSPI0406S00265127 | chr5 |                      |                    | 0.0000  | -1.54     | 1.35      | 2.90     |
| MSPI0406S00265663 | chr5 | NM_016107            | ZFR                | 0.0003  | -2.10     | 0.01      | 2.11     |
| MSPI0406S00268436 | chr5 | NM_021072            | HCN1               | 0.0008  | -1.65     | -1.53     | 0.12     |
| MSPI0406S00269033 | chr5 | NM_019087            | ARL15              | 0.0005  | -1.62     | 0.45      | 2.07     |
| MSPI0406S00270454 | chr5 | NM_001048249         | DKFZP686E2158      | 0.0000  | -1.82     | -0.33     | 1.49     |
| MSPI0406S00270455 | chr5 | NM_001048249         | DKFZP686E2158      | 0.0000  | -2.26     | -0.42     | 1.84     |
| MSPI0406S00274414 | chr5 | NM_001882            | CRHBP              | 0.0000  | -3.29     | -0.71     | 2.57     |
| MSPI0406S00275324 | chr5 | NM_003248            | THBS4              | 0.0003  | -2.11     | -0.12     | 2.00     |
| MSPI0406S00276902 | chr5 | NM_004365            | CETN3              | 0.0000  | -2.01     | 0.04      | 2.04     |
| MSPI0406S00284948 | chr5 | NM_006161            | NEUROG1            | 0.0000  | -2.29     | -1.43     | 0.86     |
| MSPI0406S00286279 | chr5 | NM_018834            | MATR3              | 0.0001  | -2.38     | -1.43     | 0.96     |
| MSPI0406S00287342 | chr5 | NM_020957, NM_019119 | PCDHB16, PCDHB9    | 0.0003  | -1.66     | 1.10      | 2.76     |
| MSPI0406S00288076 | chr5 | AK024556             |                    | 0.0005  | 1.82      | 1.23      | -0.59    |
| MSPI0406S00288561 | chr5 | NM_021182            | HMHB1              | 0.0000  | -1.53     | -0.52     | 1.01     |
| MSPI0406S00304193 | chr6 |                      |                    | 0.0000  | -1.64     | 0.54      | 2.18     |
| MSPI0406S00305367 | chr6 | NM_012135            | FAM50B             | 0.0000  | -1.64     | -0.08     | 1.55     |
| MSPI0406S00310640 | chr6 | NM_153020            | RBM24              | 0.0001  | -2.13     | 0.40      | 2.53     |
| MSPI0406S00312897 | chr6 | AB002384             | C6orf32            | 0.0001  | -1.61     | 0.64      | 2.25     |
| MSPI0406S00314948 | chr6 | M80469, AI933930     | LOC731974, C6orf12 | 0.0000  | -1.53     | 1.00      | 2.53     |
| MSPI0406S00315716 | chr6 | NM_002701            | POU5F1P4           | 0.0000  | -2.28     | -1.70     | 0.58     |
| MSPI0406S00315919 | chr6 | NM_130463, NM_005007 | ATP6V1G2, NFKBIL1  | 0.0000  | -1.63     | -0.16     | 1.46     |
| MSPI0406S00315947 | chr6 | NM_000594            | TNF                | 0.0008  | -1.58     | 0.25      | 1.82     |
| MSPI0406S00316051 | chr6 | NM_021184            | C6orf47            | 0.0000  | 1.50      | 2.75      | 1.25     |

| HELP probe sets   | Chr  | RefSeq ID            | Gene Symbol  | P-value | Meth Diff | Mean EVI1 | Mean NBM |
|-------------------|------|----------------------|--------------|---------|-----------|-----------|----------|
| MSPI0406S00317719 | chr6 | NM_181336            | LEMD2        | 0.0000  | -2.05     | -0.39     | 1.66     |
| MSPI0406S00318806 | chr6 | NM_001093728         | TCP11        | 0.0004  | 1.51      | 1.14      | -0.38    |
| MSPI0406S00321358 | chr6 | NM_015345            | DAAM2        | 0.0002  | -1.87     | -1.15     | 0.72     |
| MSPI0406S00323258 | chr6 | NM_015089            | PARC         | 0.0000  | -2.15     | -1.33     | 0.83     |
| MSPI0406S00325106 | chr6 | NM_153344            | C6orf141     | 0.0007  | -1.85     | 0.56      | 2.40     |
| MSPI0406S00326033 | chr6 | NM_001010872         | FAM83B       | 0.0000  | -1.93     | 0.78      | 2.71     |
| MSPI0406S00326173 | chr6 | NM_030820            | COL21A1      | 0.0006  | -2.23     | 0.74      | 2.97     |
| MSPI0406S00334234 | chr6 | NM_173672, NM_003080 | PPIL6, SMPD2 | 0.0001  | -1.69     | -1.39     | 0.29     |
| MSPI0406S00334364 | chr6 | NM_005284            | GPR6         | 0.0001  | -1.65     | 1.24      | 2.89     |
| MSPI0406S00337228 | chr6 | NM_001105545         | ECHDC1       | 0.0002  | 1.51      | 3.81      | 2.31     |
| MSPI0406S00348529 | chr6 | NM_175922            | PRR18        | 0.0003  | -2.00     | -0.31     | 1.70     |
| MSPI0406S00354656 | chr7 | NM_001013836         | MAD1L1       | 0.0004  | -1.63     | 0.44      | 2.07     |
| MSPI0406S00363079 | chr7 | NM_005522            | HOXA1        | 0.0001  | -2.05     | 0.93      | 2.98     |
| MSPI0406S00363085 | chr7 | NM_006735            | HOXA2        | 0.0003  | -1.81     | 1.04      | 2.84     |
| MSPI0406S00363385 | chr7 | NM_152740            | HIBADH       | 0.0001  | -1.55     | 0.24      | 1.79     |
| MSPI0406S00368119 | chr7 | NM_001129            | AEBP1        | 0.0000  | -1.83     | -0.17     | 1.66     |
| MSPI0406S00372326 | chr7 | NM_016139            | CHCHD2       | 0.0000  | -1.77     | -0.11     | 1.66     |
| MSPI0406S00394211 | chr7 | NM_013332            | HIG2         | 0.0000  | -1.94     | 0.52      | 2.46     |
| MSPI0406S00394642 | chr7 | NM_012470            | TNPO3        | 0.0000  | -2.03     | -1.18     | 0.85     |
| MSPI0406S00400025 | chr7 | NM_032982            | CASP2        | 0.0000  | -1.83     | -0.40     | 1.42     |
| MSPI0406S00413619 | chr8 | NM_024607            | PPP1R3B      | 0.0000  | 3.52      | 2.18      | -1.35    |
| MSPI0406S00416381 | chr8 | NM_019851            | FGF20        | 0.0002  | -1.93     | 1.32      | 3.24     |
| MSPI0406S00417217 | chr8 | NM_018371            | ChGn         | 0.0008  | 1.54      | 0.80      | -0.74    |
| MSPI0406S00418096 | chr8 | NM_182795            | NPM2         | 0.0001  | -2.07     | 0.26      | 2.32     |
| MSPI0406S00418452 | chr8 | NM_015359            | SLC39A14     | 0.0000  | -2.90     | -0.19     | 2.72     |
| MSPI0406S00419336 | chr8 | NM_002318            | LOXL2        | 0.0005  | -1.57     | 1.19      | 2.76     |
| MSPI0406S00419479 | chr8 | NM_006167            | NKX3-1       | 0.0001  | -2.26     | -0.10     | 2.16     |
| MSPI0406S00423672 | chr8 | NM_007198            | PROSC        | 0.0000  | -2.13     | -1.24     | 0.89     |
| MSPI0406S00423826 | chr8 | NM_001002814         | RAB11FIP1    | 0.0007  | 1.56      | 0.05      | -1.51    |
| MSPI0406S00425232 | chr8 | NM_178819            | AGPAT6       | 0.0000  | -2.08     | -0.78     | 1.31     |
| MSPI0406S00429579 | chr8 | NM_138969            | RDHE2        | 0.0002  | -1.51     | -2.60     | -1.08    |
| MSPI0406S00430774 | chr8 | NM_000370            | TTPA         | 0.0001  | -1.51     | -1.36     | 0.15     |
| MSPI0406S00431037 | chr8 | NM_004820            | CYP7B1       | 0.0000  | -1.80     | 1.09      | 2.89     |
| MSPI0406S00438678 | chr8 |                      |              | 0.0001  | 1.63      | 1.46      | -0.17    |
| MSPI0406S00456924 | chr9 | NM_004432            | ELAVL2       | 0.0000  | -1.75     | 1.31      | 3.05     |
| MSPI0406S00457313 | chr9 | NM_000459            | TEK          | 0.0000  | -2.21     | -2.10     | 0.11     |
| MSPI0406S00457963 | chr9 | NM_005802            | TOPORS       | 0.0000  | -1.71     | 0.22      | 1.92     |
| MSPI0406S00459077 | chr9 | NM_147162            | IL11RA       | 0.0000  | -2.97     | -0.91     | 2.06     |
| MSPI0406S00460689 | chr9 | NM_016042            | EXOSC3       | 0.0000  | -2.24     | 0.28      | 2.52     |
| MSPI0406S00460735 | chr9 | NM_033412            | MCART1       | 0.0001  | -2.35     | -1.09     | 1.26     |
| MSPI0406S00466605 | chr9 | NM_001098802         | CEP78        | 0.0000  | -1.82     | -1.47     | 0.35     |
| MSPI0406S00468557 | chr9 | NM_030940            | ISCA1        | 0.0001  | -1.59     | 0.41      | 2.01     |
| MSPI0406S00471981 | chr9 | NM_005392            | PHF2         | 0.0000  | -1.56     | -0.04     | 1.52     |
| MSPI0406S00474891 | chr9 | NM_004612            | TGFBR1       | 0.0000  | -1.63     | -0.01     | 1.62     |
| MSPI0406S00476961 | chr9 | NM_003798            | CTNNA1       | 0.0000  | -1.73     | 0.06      | 1.79     |
| MSPI0406S00478537 | chr9 | NM_001006615         | WDR31        | 0.0002  | -1.77     | -0.66     | 1.11     |
| MSPI0406S00488286 | chr9 | NM_014285            | EXOSC2       | 0.0000  | -2.53     | 0.73      | 3.26     |
| MSPI0406S00490859 | chr9 |                      |              | 0.0000  | -1.84     | -0.02     | 1.83     |

| HELP probe sets   | Chr   | RefSeq ID               | Gene Symbol    | P-value | Meth Diff | Mean EVI1 | Mean NBM |
|-------------------|-------|-------------------------|----------------|---------|-----------|-----------|----------|
| MSPI0406S00494265 | chr9  | NM_152833               | C9orf69        | 0.0002  | 1.91      | 1.14      | -0.77    |
| MSPI0406S00500513 | chr10 | NM_000417               | IL2RA          | 0.0001  | 1.75      | 2.06      | 0.31     |
| MSPI0406S00501433 | chr10 | NM_031923               | TAF3           | 0.0000  | -2.17     | 1.58      | 3.76     |
| MSPI0406S00520388 | chr10 | NM_018649               | H2AFY2         | 0.0002  | -1.70     | -0.70     | 0.99     |
| MSPI0406S00528396 | chr10 | NM_003972               | BTAF1          | 0.0000  | -1.94     | -1.11     | 0.83     |
| MSPI0406S00528891 | chr10 | NM_183374               | CYP26C1        | 0.0000  | -2.64     | -0.51     | 2.13     |
| MSPI0406S00533558 | chr10 | NM_017787               | C10orf26       | 0.0000  | -2.54     | -1.62     | 0.92     |
| MSPI0406S00533880 | chr10 | NM_032727               | INA            | 0.0005  | -1.67     | 0.21      | 1.88     |
| MSPI0406S00537146 | chr10 | NM_001003407            | ABLIM1         | 0.0000  | -2.50     | -0.04     | 2.46     |
| MSPI0406S00543249 | chr10 | NM_207426               | FLJ46831       | 0.0000  | -1.52     | -0.42     | 1.10     |
| MSPI0406S00553202 | chr11 | NM_014469               | RBMXL2         | 0.0000  | -1.78     | -0.94     | 0.85     |
| MSPI0406S00557657 | chr11 | NM_006157               | NELL1          | 0.0003  | -2.42     | -0.71     | 1.71     |
| MSPI0406S00558409 | chr11 | NM_030771               | CCDC34         | 0.0000  | -3.04     | -2.54     | 0.50     |
| MSPI0406S00559240 | chr11 | NM_000378, NM_015855    | WT1, WIT1      | 0.0002  | -1.67     | 2.09      | 3.76     |
| MSPI0406S00562783 | chr11 | NM_057174, NM_152312    | PEX16, GYLTL1B | 0.0000  | -1.52     | -0.48     | 1.03     |
| MSPI0406S00564200 | chr11 | NM_015308               | FNBP4          | 0.0006  | 1.51      | 1.58      | 0.07     |
| MSPI0406S00566280 | chr11 | NM_004778               | GPR44          | 0.0000  | -1.67     | -0.01     | 1.66     |
| MSPI0406S00570572 | chr11 | NM_145719               | TIGD3          | 0.0000  | -3.39     | -0.08     | 3.31     |
| MSPI0406S00576824 | chr11 | NM_021046               | KRTAP5-8       | 0.0002  | 2.00      | 0.21      | -1.79    |
| MSPI0406S00577268 | chr11 | NM_005169               | PHOX2A         | 0.0005  | -1.90     | 0.51      | 2.41     |
| MSPI0406S00578047 | chr11 | NM_021200               | PLEKHB1        | 0.0000  | -1.51     | 0.95      | 2.47     |
| MSPI0406S00579448 | chr11 | NM_020193               | C11orf30       | 0.0000  | 1.53      | 2.48      | 0.96     |
| MSPI0406S00579815 | chr11 | NM_000260               | MYO7A          | 0.0001  | -1.87     | -0.18     | 1.69     |
| MSPI0406S00582986 | chr11 | NM_130847               | AMOTL1         | 0.0000  | -1.89     | 0.48      | 2.37     |
| MSPI0406S00585712 | chr11 | NM_006235               | POU2AF1        | 0.0001  | -2.28     | -0.13     | 2.15     |
| MSPI0406S00586869 | chr11 | NM_015523               | REXO2          | 0.0001  | -1.92     | -0.50     | 1.42     |
| MSPI0406S00588918 | chr11 | NM_015157               | PHLDB1         | 0.0001  | 1.90      | 0.14      | -1.76    |
| MSPI0406S00592220 | chr11 | NM_022062               | PKNOX2         | 0.0009  | -1.50     | 0.48      | 1.98     |
| MSPI0406S00592482 | chr11 | NM_005103               | FEZ1           | 0.0001  | -1.81     | 0.88      | 2.70     |
| MSPI0406S00600078 | chr12 | NM_000552               | VWF            | 0.0000  | -2.03     | 0.39      | 2.42     |
| MSPI0406S00600155 | chr12 | NM_001769               | CD9            | 0.0006  | -1.70     | 1.19      | 2.90     |
| MSPI0406S00601262 | chr12 | NM_020634               | GDF3           | 0.0001  | -2.15     | 0.36      | 2.51     |
| MSPI0406S00602696 | chr12 | NM_003651               | CSDA           | 0.0000  | -2.00     | 0.23      | 2.23     |
| MSPI0406S00606787 | chr12 | NM_006390               | IPO8           | 0.0000  | -2.30     | -2.06     | 0.24     |
| MSPI0406S00612781 | chr12 | NM_000020               | ACVRL1         | 0.0005  | -1.52     | 0.44      | 1.95     |
| MSPI0406S00613096 | chr12 | NM_002281               | KRT81          | 0.0000  | -2.57     | -1.15     | 1.43     |
| MSPI0406S00614215 | chr12 | NM_020898               | CALCOCO1       | 0.0000  | -1.57     | -1.19     | 0.38     |
| MSPI0406S00614766 | chr12 | NM_006741               | PPP1R1A        | 0.0000  | -1.77     | -0.87     | 0.90     |
| MSPI0406S00616460 | chr12 | NM_133483, NM_001111270 | GEFT           | 0.0000  | 1.53      | 3.87      | 2.34     |
| MSPI0406S00617895 | chr12 | NM_001031679            | MSRB3          | 0.0001  | -2.26     | 0.62      | 2.87     |
| MSPI0406S00619189 | chr12 | NM_002849               | PTPRR          | 0.0000  | -1.80     | -1.53     | 0.28     |
| MSPI0406S00625770 | chr12 | NM_152261               | C12orf23       | 0.0002  | -2.52     | -0.38     | 2.15     |
| MSPI0406S00626032 | chr12 | NM_012406               | PRDM4          | 0.0000  | -1.54     | -1.80     | -0.26    |
| MSPI0406S00634978 | chr12 | NM_001024808            | BCL7A          | 0.0007  | -1.66     | 1.02      | 2.68     |
| MSPI0406S00641583 | chr12 | NM_003565               | ULK1           | 0.0001  | -1.56     | -0.34     | 1.22     |
| MSPI0406S00646456 | chr13 | NM_001260               | CDK8           | 0.0000  | -2.35     | -0.75     | 1.60     |
| MSPI0406S00647008 | chr13 | NM_002097               | GTF3A          | 0.0010  | -2.04     | 0.51      | 2.55     |
| MSPI0406S00649799 | chr13 | NM_203451               | LOC400120      | 0.0000  | -1.71     | -0.28     | 1.43     |

| HELP probe sets   | Chr   | RefSeq ID                       | Gene Symbol             | P-value | Meth Diff | Mean EVI1 | Mean NBM |
|-------------------|-------|---------------------------------|-------------------------|---------|-----------|-----------|----------|
| MSPI0406S00652106 | chr13 | NM_015070                       | ZC3H13                  | 0.0002  | -1.79     | 0.36      | 2.15     |
| MSPI0406S00653659 | chr13 | NM_024705                       | DHRS12                  | 0.0000  | -3.02     | -0.75     | 2.27     |
| MSPI0406S00661059 | chr13 | NM_033132                       | ZIC5                    | 0.0004  | -1.66     | 1.91      | 3.57     |
| MSPI0406S00668987 | chr14 | NM_004643                       | PABPN1                  | 0.0000  | -2.56     | -1.59     | 0.97     |
| MSPI0406S00669167 | chr14 | BE673662                        | ZFHX2                   | 0.0006  | -1.86     | -0.56     | 1.30     |
| MSPI0406S00670532 | chr14 | NM_004086                       | COCH                    | 0.0000  | -1.95     | -0.48     | 1.46     |
| MSPI0406S00676765 | chr14 | NM_001079520                    | DACT1                   | 0.0000  | -2.07     | -0.07     | 2.00     |
| MSPI0406S00680432 | chr14 | NM_033262                       | SLC8A3                  | 0.0001  | -1.72     | -0.59     | 1.13     |
| MSPI0406S00685030 | chr14 | NM_015859                       | GTF2A1                  | 0.0001  | -2.18     | 0.31      | 2.49     |
| MSPI0406S00686729 | chr14 | NM_022054                       | KCNK13                  | 0.0006  | -2.15     | -0.35     | 1.81     |
| MSPI0406S00690443 | chr14 | NM_018036                       | ATG2B                   | 0.0000  | -1.56     | -0.98     | 0.58     |
| MSPI0406S00696953 | chr14 | AI935123                        | AHNAK2                  | 0.0001  | 1.59      | -0.17     | -1.76    |
| MSPI0406S00696954 | chr14 | AI935123                        | AHNAK2                  | 0.0000  | 2.01      | 1.50      | -0.50    |
| MSPI0406S00700799 | chr15 | NM_024490                       | ATP10A                  | 0.0001  | 1.99      | 1.96      | -0.03    |
| MSPI0406S00701188 | chr15 | NM_033223                       | GABRG3                  | 0.0000  | -1.93     | -0.10     | 1.83     |
| MSPI0406S00703260 | chr15 | NM_017762                       | MTMR10                  | 0.0000  | 1.59      | 1.60      | 0.01     |
| MSPI0406S00704116 | chr15 | NM_003020                       | SCG5                    | 0.0000  | -2.78     | -1.42     | 1.36     |
| MSPI0406S00706126 | chr15 | NM_033286                       | C15orf23                | 0.0005  | -1.53     | 1.32      | 2.85     |
| MSPI0406S00714988 | chr15 | NM_194272                       | RBPM52                  | 0.0000  | -1.63     | -0.61     | 1.03     |
| MSPI0406S00717528 | chr15 | NM_017705                       | PAQR5                   | 0.0000  | -2.33     | -0.10     | 2.22     |
| MSPI0406S00720935 | chr15 | NM_001897                       | CSPG4                   | 0.0000  | -1.70     | 0.03      | 1.74     |
| MSPI0406S00722613 | chr15 | NM_006791                       | MORF4L1                 | 0.0010  | -1.76     | -1.21     | 0.55     |
| MSPI0406S00723766 | chr15 | NM_032246                       | MEX3B                   | 0.0001  | -1.82     | 1.38      | 3.20     |
| MSPI0406S00726849 | chr15 |                                 |                         | 0.0000  | -1.79     | 0.50      | 2.29     |
| MSPI0406S00735207 | chr16 | NM_023076                       | C16orf28                | 0.0002  | -1.76     | -0.71     | 1.05     |
| MSPI0406S00736025 | chr16 | NM_144603                       | NOXO1                   | 0.0000  | -1.68     | 0.83      | 2.51     |
| MSPI0406S00736456 | chr16 | NM_001374                       | DNASE1L2                | 0.0000  | -1.56     | 0.02      | 1.58     |
| MSPI0406S00745502 | chr16 | NM_033201                       | C16orf45                | 0.0000  | -1.85     | -0.11     | 1.74     |
| MSPI0406S00751950 | chr16 | NM_015202, NM_001520            | KIAA0556, GTF3C1        | 0.0000  | -1.96     | 0.09      | 2.05     |
| MSPI0406S00754682 | chr16 | NM_016643                       | ZNF771                  | 0.0000  | -1.62     | -1.24     | 0.39     |
| MSPI0406S00755815 | chr16 | NM_015927                       | TGFB1I1                 | 0.0004  | -1.64     | -0.34     | 1.30     |
| MSPI0406S00760933 | chr16 | NM_005953                       | MT2A                    | 0.0000  | -2.03     | -1.57     | 0.46     |
| MSPI0406S00765599 | chr16 | NM_018667                       | SMPD3                   | 0.0007  | -1.66     | 0.22      | 1.88     |
| MSPI0406S00772241 | chr16 | NM_022041                       | GAN                     | 0.0002  | -1.74     | 1.24      | 2.98     |
| MSPI0406S00777297 | chr16 | NM_015144                       | ZCCHC14                 | 0.0000  | -1.75     | -0.65     | 1.10     |
| MSPI0406S00777570 | chr16 | AI797462                        | KLHDC4                  | 0.0005  | -1.60     | -1.17     | 0.43     |
| MSPI0406S00778118 | chr16 |                                 |                         | 0.0000  | -1.79     | 0.23      | 2.02     |
| MSPI0406S00785511 | chr17 |                                 |                         | 0.0000  | 3.69      | 2.16      | -1.53    |
| MSPI0406S00785512 | chr17 |                                 |                         | 0.0000  | 2.13      | 2.33      | 0.20     |
| MSPI0406S00786244 | chr17 | NM_153018                       | ZFP3                    | 0.0000  | -1.73     | -0.12     | 1.61     |
| MSPI0406S00787973 | chr17 | NM_001002914                    | KCTD11                  | 0.0000  | -1.58     | -0.14     | 1.44     |
| MSPI0406S00788425 | chr17 | NM_001406                       | EFNB3                   | 0.0000  | -1.85     | 1.09      | 2.94     |
| MSPI0406S00788661 | chr17 | NM_004732                       | KCNAB3                  | 0.0001  | -1.64     | -1.06     | 0.58     |
| MSPI0406S00788662 | chr17 | NM_004732                       | KCNAB3                  | 0.0000  | -1.66     | -1.59     | 0.07     |
| MSPI0406S00788663 | chr17 | NM_004732, NM_053051, NM_021210 | KCNAB3, CNTROB, TRAPPC1 | 0.0000  | -2.97     | -1.49     | 1.48     |
| MSPI0406S00791659 | chr17 | NM_014859                       | RICH2                   | 0.0000  | -2.83     | -1.38     | 1.45     |
| MSPI0406S00793116 | chr17 | NM_181716                       | PRR6                    | 0.0000  | -2.32     | -1.65     | 0.67     |

| HELP probe sets   | Chr   | RefSeq ID               | Gene Symbol         | P-value | Meth Diff | Mean EVI1 | Mean NBM |
|-------------------|-------|-------------------------|---------------------|---------|-----------|-----------|----------|
| MSPI0406S00798560 | chr17 | NM_144610               | FLJ25006            | 0.0000  | -2.49     | -1.84     | 0.64     |
| MSPI0406S00801497 | chr17 | NM_183377               | ACCN1               | 0.0006  | -1.53     | -1.59     | -0.06    |
| MSPI0406S00810245 | chr17 | NM_174919               | LOC201175           | 0.0005  | -2.20     | -1.20     | 0.99     |
| MSPI0406S00811398 | chr17 | NM_001002841            | MYL4                | 0.0000  | -1.87     | -1.03     | 0.84     |
| MSPI0406S00812189 | chr17 |                         |                     | 0.0008  | -1.64     | 0.66      | 2.31     |
| MSPI0406S00817603 | chr17 | NM_181707               | C17orf64            | 0.0007  | 1.82      | 1.35      | -0.47    |
| MSPI0406S00818930 | chr17 | NM_015623               | TANC2               | 0.0000  | -2.11     | -0.48     | 1.63     |
| MSPI0406S00818949 | chr17 | NM_001017917            | CYB561              | 0.0000  | -1.79     | 0.61      | 2.40     |
| MSPI0406S00826117 | chr17 |                         |                     | 0.0000  | -1.83     | -0.53     | 1.30     |
| MSPI0406S00826166 | chr17 | NM_001003715, NM_013260 | RECQL5, SAP30BP     | 0.0006  | -2.16     | -0.04     | 2.12     |
| MSPI0406S00826327 | chr17 |                         |                     | 0.0000  | -2.00     | 0.39      | 2.39     |
| MSPI0406S00829958 | chr17 | NM_138793               | CANT1               | 0.0000  | -2.90     | -1.30     | 1.60     |
| MSPI0406S00831072 | chr17 | BC001525                | TBC1D16             | 0.0002  | -2.13     | 0.45      | 2.57     |
| MSPI0406S00831073 | chr17 | BC001525                | TBC1D16             | 0.0008  | -1.57     | -0.25     | 1.32     |
| MSPI0406S00838340 | chr18 | NM_003409               | ZFP161              | 0.0004  | -1.57     | 1.26      | 2.83     |
| MSPI0406S00841050 | chr18 | NM_032525               | TUBB6               | 0.0000  | -2.29     | 0.66      | 2.96     |
| MSPI0406S00841051 | chr18 | NM_032525               | TUBB6               | 0.0000  | -2.21     | 0.82      | 3.03     |
| MSPI0406S00844006 | chr18 | NM_080597               | OSBPL1A             | 0.0006  | -1.73     | -0.94     | 0.79     |
| MSPI0406S00847965 | chr18 | NM_152470               | RNF165              | 0.0000  | -1.55     | -0.96     | 0.58     |
| MSPI0406S00848242 | chr18 | NM_004671               | PIAS2               | 0.0000  | -2.87     | -0.58     | 2.29     |
| MSPI0406S00852330 | chr18 | NM_021127               | PMAIP1              | 0.0000  | -3.59     | -1.23     | 2.36     |
| MSPI0406S00858022 | chr18 | NM_004715               | CTDP1               | 0.0000  | 1.73      | 1.37      | -0.35    |
| MSPI0406S00861872 | chr19 | NM_012458               | TIMM13              | 0.0000  | -1.66     | -0.31     | 1.35     |
| MSPI0406S00862264 | chr19 | NM_145173               | DIRAS1              | 0.0004  | 1.58      | 1.59      | 0.01     |
| MSPI0406S00866032 | chr19 | U40317                  | PTPRS               | 0.0000  | 1.75      | 2.10      | 0.35     |
| MSPI0406S00868626 | chr19 | NM_006702               | PNPLA6              | 0.0001  | -1.51     | 1.41      | 2.93     |
| MSPI0406S00870600 | chr19 | NM_152476               | ZNF560              | 0.0003  | -2.32     | -0.85     | 1.47     |
| MSPI0406S00874436 | chr19 | AI937201                | NFIX                | 0.0000  | -2.62     | 1.02      | 3.64     |
| MSPI0406S00881670 | chr19 | NM_153221               | CILP2               | 0.0003  | -1.73     | 0.27      | 2.00     |
| MSPI0406S00890230 | chr19 | NM_181786               | HKR1                | 0.0008  | -1.89     | 1.21      | 3.10     |
| MSPI0406S00897488 | chr19 | NM_030785               | RSHL1               | 0.0004  | -1.89     | 1.51      | 3.39     |
| MSPI0406S00898094 | chr19 | NM_020709               | KIAA1183            | 0.0001  | -1.50     | 1.28      | 2.78     |
| MSPI0406S00900558 | chr19 | AF245447                | SPHK2               | 0.0000  | -1.88     | -0.07     | 1.81     |
| MSPI0406S00900627 | chr19 | NM_145807               | LOC126147           | 0.0000  | -2.13     | -1.44     | 0.69     |
| MSPI0406S00901219 | chr19 | W67744                  | SNRP70              | 0.0003  | -1.88     | -0.15     | 1.73     |
| MSPI0406S00902145 | chr19 | BC024312                | MED25               | 0.0000  | 1.97      | 2.90      | 0.93     |
| MSPI0406S00903958 | chr19 | AI479923, T81826        | LOC339352, FLJ30403 | 0.0000  | -2.60     | -0.48     | 2.13     |
| MSPI0406S00904370 | chr19 | NM_001010851            | ZNF766              | 0.0000  | -1.93     | -0.63     | 1.30     |
| MSPI0406S00908309 | chr19 | NM_144690               | ZNF582              | 0.0000  | -3.31     | -3.11     | 0.19     |
| MSPI0406S00908340 | chr19 | NM_022103               | ZNF667              | 0.0001  | -3.01     | -0.45     | 2.56     |
| MSPI0406S00908349 | chr19 | NM_020813               | ZNF471              | 0.0007  | -1.61     | -1.21     | 0.40     |
| MSPI0406S00908360 | chr19 | NM_020828               | ZFP28               | 0.0000  | -2.59     | -0.06     | 2.53     |
| MSPI0406S00911124 | chr20 | NM_024325               | ZNF343              | 0.0000  | -1.88     | 0.39      | 2.27     |
| MSPI0406S00913877 | chr20 | NM_018848, NM_001009608 | MKKS, C20orf94      | 0.0001  | -1.72     | 0.03      | 1.75     |
| MSPI0406S00914181 | chr20 | NM_014962               | BTBD3               | 0.0009  | -1.55     | 1.61      | 3.16     |
| MSPI0406S00914183 | chr20 | NM_014962               | BTBD3               | 0.0005  | -1.91     | 1.30      | 3.21     |
| MSPI0406S00921311 | chr20 | NM_021202               | TP53INP2            | 0.0000  | -1.70     | -0.19     | 1.51     |
| MSPI0406S00923469 | chr20 | NM_005386               | NNAT                | 0.0004  | -1.89     | 0.15      | 2.04     |

| HELP probe sets   | Chr   | RefSeq ID    | Gene Symbol | P-value | Meth Diff | Mean EVI1 | Mean NBM |
|-------------------|-------|--------------|-------------|---------|-----------|-----------|----------|
| MSPI0406S00923470 | chr20 | NM_005386    | NNAT        | 0.0000  | -1.96     | -0.13     | 1.83     |
| MSPI0406S00925914 | chr20 | NM_001098798 | TOX2        | 0.0001  | 1.93      | 0.97      | -0.96    |
| MSPI0406S00926213 | chr20 | NM_178850    | HNF4A       | 0.0000  | -2.60     | 0.69      | 3.29     |
| MSPI0406S00929615 | chr20 | NM_000961    | PTGIS       | 0.0009  | -1.86     | 1.00      | 2.86     |
| MSPI0406S00934116 | chr20 | NM_080618    | CTCF        | 0.0010  | -1.56     | -0.51     | 1.04     |
| MSPI0406S00934954 | chr20 | NM_001001433 | STX16       | 0.0000  | -1.63     | -1.43     | 0.20     |
| MSPI0406S00946573 | chr21 | NM_018962    | DSCR6       | 0.0007  | -1.95     | 1.19      | 3.14     |
| MSPI0406S00951810 | chr21 | NM_198696    | KRTAP10-3   | 0.0000  | -1.81     | -1.27     | 0.54     |
| MSPI0406S00960076 | chr22 | NM_013378    | VPREB3      | 0.0000  | -2.28     | -0.66     | 1.63     |
| MSPI0406S00961868 | chr22 | NM_021115    | SEZ6L       | 0.0001  | 1.69      | 1.34      | -0.35    |
| MSPI0406S00970740 | chr22 | NM_014292    | CBX6        | 0.0007  | 1.59      | 0.47      | -1.12    |
| MSPI0406S00971904 | chr22 |              |             | 0.0002  | -1.90     | 0.93      | 2.83     |
| MSPI0406S00988001 | chrX  | NM_015507    | EGFL6       | 0.0007  | -1.69     | 0.30      | 1.99     |
| MSPI0406S00990104 | chrX  | NM_152780    | MAP7D2      | 0.0000  | -1.77     | -0.52     | 1.25     |
| MSPI0406S00998164 | chrX  | NM_006150    | LMO6        | 0.0002  | -1.52     | 0.25      | 1.77     |
| MSPI0406S00998450 | chrX  | NM_000084    | CLCN5       | 0.0000  | -1.70     | -0.49     | 1.21     |
| MSPI0406S00998736 | chrX  | NM_018094    | GSPT2       | 0.0003  | -2.44     | -1.65     | 0.79     |
| MSPI0406S01007247 | chrX  | NM_080737    | SYTL4       | 0.0000  | -1.62     | -0.56     | 1.06     |
| MSPI0406S01007951 | chrX  | NM_030639    | BHLHB9      | 0.0000  | -1.89     | -0.49     | 1.40     |
| MSPI0406S01010836 | chrX  | NM_173798    | ZCCHC12     | 0.0000  | -2.40     | -0.31     | 2.08     |
| MSPI0406S01011804 | chrX  | NM_014060    | MCTS1       | 0.0004  | -2.11     | -2.02     | 0.09     |
| MSPI0406S01020295 | chrX  | NM_021806    | FAM3A       | 0.0000  | -2.49     | 0.11      | 2.59     |



**Table S3. Gene Ontology (GO) categories highly represented among the 294 differentially methylated genes**

| GO Term                                       | # Genes | % Genes | P-Value  | Fold Enrichment | FDR (%) |
|-----------------------------------------------|---------|---------|----------|-----------------|---------|
| Intracellular membrane-bound organelle        | 125     | 43.7%   | 3.78E-04 | 1.24            | 0.57    |
| Regulation of transcription                   | 55      | 19.2%   | 1.85E-03 | 1.47            | 3.23    |
| Transcription, DNA-dependent                  | 51      | 17.8%   | 5.76E-03 | 1.43            | 9.73    |
| RNA biosynthetic process                      | 51      | 17.8%   | 5.90E-03 | 1.42            | 9.95    |
| Cell morphogenesis                            | 16      | 5.6%    | 5.38E-03 | 2.23            | 9.12    |
| Cellular morphogenesis during differentiation | 8       | 2.8%    | 7.63E-03 | 3.52            | 12.68   |

FDR; false discovery rate.

**Table S4. FIRE analysis on the differentially methylated *EVII* AML genes and a separate analysis on the hyper- and hypomethylated genes**

| FIRE analysis differentially methylated genes (n=294)                                     |          |            |                  |                    |         |            |
|-------------------------------------------------------------------------------------------|----------|------------|------------------|--------------------|---------|------------|
| Optimized Motif                                                                           | Location | Robustness | Orientation Bias | Conservation Index | Seed    | Motif name |
| [CGT][AT]CGTA[GT]C[CG]                                                                    | 5'       | 10/10      | ←                | 0.48               | ACGTAGC | -          |
| [CGT]CTGACA.[AC]                                                                          | 5'       | 9/10       | ←                | 0.54               | CTGACAA | -          |
| [CT]AA[AC]GCC[GT]                                                                         | 5'       | 8/10       | ←                | 0.31               | AAAGCCT | -          |
| FIRE analysis <i>hypermethylated</i> genes (n=238) and <i>hypomethylated</i> genes (n=56) |          |            |                  |                    |         |            |
| Optimized Motif                                                                           | Location | Robustness | Orientation Bias | Conservation Index | Seed    | Motif name |
| [AG]A[AG]TCATT[GT]                                                                        | 5'       | 9/10       | -                | 0.79               | AATCATT | GCN4       |
| .C[CG]T[GT]ACA[ACT]                                                                       | 5'       | 9/10       | -                | 0.31               | CCTGACA | -          |
| [AC]CCTACC[AC].                                                                           | 5'       | 6/10       | →                | 0.36               | CCTACCC | P          |
| [ACG]AGCGGCG.                                                                             | 5'       | 7/10       | -                | 0.88               | AGCGGCG | -          |

For each motif, location, i.e. 5' upstream region, robustness score ranging from 0/10 to 10/10 obtained from ten jack-knife trails of randomly removing one-third of the genes and reassessing the statistical significance, orientation bias indicator, conservation index and seed that gave rise to the motif.

**Table S5. The 110 genes differentially methylated between the two *EVII* subclusters, i.e Cluster A, enriched for *MLL*-rearranged AMLs and Cluster B, enriched for 3q26 aberrations and monosomy 7**

| HELP probe sets   | Chr. | Ref Seq ID              | Gene Symbol        | P-value | Meth Diff | Mean Cluster A | Mean Cluster B | CpG Cluster | CpG Island |
|-------------------|------|-------------------------|--------------------|---------|-----------|----------------|----------------|-------------|------------|
| MSPI0406S00014167 | chr1 | NM_015164               | PLEKHM2            | 0.0000  | 2.17      | 2.04           | -0.13          | -           | -          |
| MSPI0406S00014983 | chr1 | NM_018090,<br>NM_198546 | NECAP2,<br>SPATA21 | 0.0000  | 1.67      | 0.67           | -1.00          | YES         | YES        |
| MSPI0406S00019401 | chr1 | NM_005529               | HSPG2              | 0.0000  | 1.52      | 0.97           | -0.56          | YES         | -          |
| MSPI0406S00027314 | chr1 | NM_175852               | TXLNA              | 0.0009  | 1.65      | 1.11           | -0.54          | YES         | -          |
| MSPI0406S00029456 | chr1 | NM_005202               | COL8A2             | 0.0000  | 1.51      | 1.54           | 0.03           | -           | -          |
| MSPI0406S00033843 | chr1 | NM_014663               | JMJD2A             | 0.0001  | 1.68      | 0.72           | -0.96          | YES         | -          |
| MSPI0406S00049084 | chr1 | NM_020703               | AMIGO1             | 0.0000  | 1.56      | 1.16           | -0.40          | YES         | YES        |
| MSPI0406S00054187 | chr1 | NM_014849               | SV2A               | 0.0006  | 1.72      | 2.14           | 0.42           | -           | -          |
| MSPI0406S00057660 | chr1 | NM_001105203            | RUSC1              | 0.0000  | 1.77      | 2.02           | 0.26           | -           | -          |
| MSPI0406S00060281 | chr1 | NM_001025598            | ARHGAP30           | 0.0000  | 1.54      | 0.69           | -0.85          | -           | -          |
| MSPI0406S00062858 | chr1 | NM_001007239            | KIAA0859           | 0.0001  | 2.12      | 0.26           | -1.86          | YES         | YES        |
| MSPI0406S00093425 | chr2 | NM_002539               | ODC1               | 0.0001  | 1.71      | 0.50           | -1.21          | -           | -          |
| MSPI0406S00122762 | chr2 | NM_001039492            | FHL2               | 0.0001  | 1.60      | 1.82           | 0.21           | YES         | YES        |
| MSPI0406S00123952 | chr2 | NM_022336               | EDAR               | 0.0000  | 1.75      | 1.04           | -0.71          | YES         | -          |
| MSPI0406S00146170 | chr2 | NM_152526               | PARD3B             | 0.0009  | 1.53      | 2.13           | 0.61           | YES         | -          |
| MSPI0406S00161233 | chr2 | NM_014808               | FARP2              | 0.0000  | 1.80      | 1.47           | -0.33          | YES         | -          |
| MSPI0406S00173130 | chr3 | NM_002295               | RPSA               | 0.0002  | 1.93      | 1.79           | -0.14          | YES         | YES        |
| MSPI0406S00180421 | chr3 | NA                      |                    | 0.0000  | 1.85      | 1.08           | -0.77          | -           | -          |
| MSPI0406S00208027 | chr3 | NM_005688               | ABCC5              | 0.0003  | 1.60      | -0.57          | -2.17          | YES         | -          |
| MSPI0406S00236887 | chr4 | NM_138980               | MAPK10             | 0.0006  | 1.59      | -0.05          | -1.64          | -           | -          |
| MSPI0406S00238917 | chr4 | NM_002106               | H2AFZ              | 0.0002  | 1.55      | 1.09           | -0.46          | YES         | -          |
| MSPI0406S00245296 | chr4 | NM_002039               | GAB1               | 0.0002  | 2.23      | 1.75           | -0.48          | YES         | YES        |
| MSPI0406S00250036 | chr4 | NM_016228               | AADAT              | 0.0001  | 1.68      | 0.68           | -1.00          | YES         | -          |
| MSPI0406S00260211 | chr5 | NA                      |                    | 0.0006  | 2.78      | 0.39           | -2.39          | -           | -          |
| MSPI0406S00290573 | chr5 | BE673151                | MYOZ3              | 0.0000  | 1.59      | 1.71           | 0.12           | YES         | -          |
| MSPI0406S00293417 | chr5 | NM_022090               | LOC63920           | 0.0001  | 1.51      | -1.14          | -2.65          | -           | -          |
| MSPI0406S00301996 | chr5 | NM_024978               |                    | 0.0002  | 2.44      | 1.91           | -0.52          | -           | -          |
| MSPI0406S00301997 | chr5 | NM_024978               |                    | 0.0005  | 1.83      | 1.07           | -0.76          | -           | -          |
| MSPI0406S00302259 | chr5 | NM_018434               | RNF130             | 0.0001  | 1.89      | 2.20           | 0.31           | YES         | -          |
| MSPI0406S00316130 | chr6 | NM_013974               | DDAH2              | 0.0001  | 1.76      | 1.99           | 0.23           | YES         | YES        |
| MSPI0406S00319826 | chr6 | NA                      |                    | 0.0006  | 1.81      | 1.28           | -0.53          | -           | -          |
| MSPI0406S00346373 | chr6 | NM_003058               | SLC22A2            | 0.0004  | 1.58      | 1.87           | 0.29           | -           | -          |
| MSPI0406S00353042 | chr7 | NM_001505               | GPER               | 0.0000  | 1.50      | 0.87           | -0.63          | YES         | YES        |
| MSPI0406S00361726 | chr7 | NM_000600               | IL6                | 0.0000  | 1.63      | 2.55           | 0.92           | -           | -          |
| MSPI0406S00363122 | chr7 | NM_019102               | HOXA5              | 0.0003  | 2.26      | 1.39           | -0.88          | YES         | YES        |
| MSPI0406S00368847 | chr7 | NA                      |                    | 0.0006  | 1.64      | -0.06          | -1.70          | -           | -          |
| MSPI0406S00400041 | chr7 | NM_000083               | CLCN1              | 0.0000  | 1.92      | 0.22           | -1.71          | -           | -          |
| MSPI0406S00400042 | chr7 | NM_000083               | CLCN1              | 0.0000  | 2.07      | 1.28           | -0.80          | -           | -          |
| MSPI0406S00414913 | chr8 | NM_054029               | C8orf14            | 0.0002  | 2.07      | 0.98           | -1.09          | -           | -          |
| MSPI0406S00427034 | chr8 | NM_001080394            | KIAA0146           | 0.0002  | 1.78      | 1.33           | -0.46          | YES         | YES        |
| MSPI0406S00440889 | chr8 | NM_022783               | DEPDC6             | 0.0000  | 1.97      | 2.65           | 0.68           | YES         | YES        |

| HELP probe sets   | Chr.  | Ref Seq ID              | Gene Symbol             | P-value | Meth Diff | Mean Cluster A | Mean Cluster B | CpG Cluster | CpG Island |
|-------------------|-------|-------------------------|-------------------------|---------|-----------|----------------|----------------|-------------|------------|
| MSPI0406S00450835 | chr8  | NM_030974               | SHARPIN                 | 0.0000  | 1.72      | 0.00           | -1.72          | YES         | -          |
| MSPI0406S00451398 | chr8  | NM_016208               | VPS28                   | 0.0007  | 1.67      | 2.18           | 0.51           | YES         | -          |
| MSPI0406S00459565 | chr9  | NM_003995               | NPR2                    | 0.0000  | 1.56      | -0.32          | -1.88          | YES         | -          |
| MSPI0406S00478974 | chr9  | NM_138424               | KIF12                   | 0.0002  | 1.70      | 1.74           | 0.04           | YES         | YES        |
| MSPI0406S00481107 | chr9  | BF513822                | DAB2IP                  | 0.0000  | 1.51      | 1.93           | 0.42           | -           | -          |
| MSPI0406S00486447 | chr9  | NM_004003,<br>NM_021131 | CRAT,<br>PPP2R4         | 0.0000  | 1.86      | 0.41           | -1.45          | YES         | -          |
| MSPI0406S00489085 | chr9  | AB011087                | KIAA0515                | 0.0000  | 1.90      | 1.56           | -0.33          | -           | -          |
| MSPI0406S00494431 | chr9  | NA                      |                         | 0.0001  | 1.58      | -1.35          | -2.93          | -           | -          |
| MSPI0406S00496573 | chr9  | NA                      |                         | 0.0000  | 1.55      | 1.03           | -0.52          | YES         | YES        |
| MSPI0406S00497723 | chr10 | NM_014974               | DIP2C                   | 0.0002  | 1.76      | 0.79           | -0.97          | YES         | -          |
| MSPI0406S00509727 | chr10 | AL553774                | KIAA1462                | 0.0001  | 1.78      | 3.11           | 1.34           | -           | -          |
| MSPI0406S00509728 | chr10 | AL553774                | KIAA1462                | 0.0001  | 1.55      | 0.17           | -1.38          | -           | -          |
| MSPI0406S00522801 | chr10 | NM_173540               | FUT11                   | 0.0001  | 1.88      | 1.20           | -0.68          | YES         | YES        |
| MSPI0406S00523480 | chr10 | NM_144589               | COMTD1                  | 0.0001  | 1.61      | 0.36           | -1.25          | YES         | YES        |
| MSPI0406S00531525 | chr10 | AF267854                | SLC25A28                | 0.0001  | 1.58      | 1.39           | -0.19          | -           | -          |
| MSPI0406S00531531 | chr10 | NM_031212               | SLC25A28                | 0.0001  | 1.67      | 3.10           | 1.44           | YES         | YES        |
| MSPI0406S00531671 | chr10 | AB023227                | DNMBP                   | 0.0002  | 1.75      | -0.44          | -2.19          | -           | -          |
| MSPI0406S00532654 | chr10 | NM_015448,<br>NM_013274 | POLL, RP11-<br>529I10.4 | 0.0000  | 1.61      | 0.50           | -1.11          | -           | -          |
| MSPI0406S00539049 | chr10 | NM_001005339            | RGS10                   | 0.0006  | 1.88      | 2.54           | 0.66           | YES         | YES        |
| MSPI0406S00550614 | chr11 | BC002550                | H19                     | 0.0001  | 1.51      | 1.00           | -0.50          | YES         | YES        |
| MSPI0406S00577268 | chr11 | NM_005169               | PHOX2A                  | 0.0003  | 1.74      | 1.45           | -0.30          | -           | -          |
| MSPI0406S00577800 | chr11 | NM_002564               | P2RY2                   | 0.0001  | 1.89      | 2.20           | 0.31           | YES         | YES        |
| MSPI0406S00585215 | chr11 | NM_004398               | LOC401533               | 0.0000  | 1.83      | 0.98           | -0.85          | YES         | YES        |
| MSPI0406S00592025 | chr11 | NM_014312               | VSIG2                   | 0.0000  | 1.65      | 1.74           | 0.09           | YES         | -          |
| MSPI0406S00600155 | chr12 | NM_001769               | CD9                     | 0.0000  | 1.75      | 2.13           | 0.39           | YES         | YES        |
| MSPI0406S00600647 | chr12 | NM_016162               | ING4                    | 0.0002  | 1.66      | 1.57           | -0.09          | -           | -          |
| MSPI0406S00600942 | chr12 | Z22814                  | ATN1                    | 0.0000  | 2.13      | -0.11          | -2.24          | -           | -          |
| MSPI0406S00601262 | chr12 | NM_020634               | GDF3                    | 0.0000  | 1.98      | 1.43           | -0.55          | -           | -          |
| MSPI0406S00601366 | chr12 | NM_024865               | NANOG                   | 0.0006  | 1.71      | -0.51          | -2.22          | -           | -          |
| MSPI0406S00604787 | chr12 | NM_153207               | AEBP2                   | 0.0001  | 1.55      | -0.34          | -1.89          | YES         | -          |
| MSPI0406S00605562 | chr12 | NM_144667               | FLJ32894                | 0.0002  | 1.64      | -1.18          | -2.82          | -           | -          |
| MSPI0406S00611736 | chr12 | NM_147190               | LASS5                   | 0.0001  | 1.65      | 0.69           | -0.95          | YES         | -          |
| MSPI0406S00614653 | chr12 | NM_020370               | GPR84                   | 0.0008  | 2.10      | 1.79           | -0.31          | -           | -          |
| MSPI0406S00616342 | chr12 | NM_004990               | MARS                    | 0.0000  | 1.96      | 0.68           | -1.29          | YES         | -          |
| MSPI0406S00619875 | chr12 | NM_024685               | BBS10                   | 0.0000  | 1.59      | 0.98           | -0.61          | YES         | -          |
| MSPI0406S00620956 | chr12 | NM_005447               | PAMCI                   | 0.0005  | 1.97      | 2.10           | 0.13           | -           | -          |
| MSPI0406S00621954 | chr12 | NM_199040               | NUDT4P1                 | 0.0001  | 2.50      | 2.02           | -0.48          | YES         | YES        |
| MSPI0406S00629691 | chr12 | NM_017901               | TPCN1                   | 0.0004  | 1.54      | 0.85           | -0.68          | -           | -          |
| MSPI0406S00633671 | chr12 | NM_004276               | CABP1                   | 0.0005  | 1.62      | 0.99           | -0.63          | -           | -          |
| MSPI0406S00663882 | chr13 | NA                      |                         | 0.0000  | 1.57      | -1.11          | -2.68          | -           | YES        |
| MSPI0406S00679968 | chr14 | AI431597                | WDR22                   | 0.0000  | 1.58      | -1.06          | -2.64          | YES         | -          |
| MSPI0406S00697563 | chr14 | AK098354                | PACS2                   | 0.0000  | 2.14      | 1.13           | -1.01          | -           | -          |
| MSPI0406S00705935 | chr15 | NM_001211               | BUB1B                   | 0.0000  | 1.84      | 1.87           | 0.03           | YES         | YES        |
| MSPI0406S00706182 | chr15 | NM_014952               | BAHD1                   | 0.0000  | 1.50      | 2.40           | 0.89           | -           | -          |

| HELP probe sets   | Chr.  | Ref Seq ID              | Gene Symbol        | P-value | Meth Diff | Mean Cluster A | Mean Cluster B | CpG Cluster | CpG Island |
|-------------------|-------|-------------------------|--------------------|---------|-----------|----------------|----------------|-------------|------------|
| MSPI0406S00708457 | chr15 | NM_025165               | ELL3               | 0.0000  | 1.74      | 2.74           | 1.01           | YES         | YES        |
| MSPI0406S00716590 | chr15 | NM_005902               | SMAD3              | 0.0003  | 1.56      | 3.05           | 1.49           | YES         | -          |
| MSPI0406S00718319 | chr15 | NM_018003               | UACA               | 0.0007  | 1.73      | 1.34           | -0.39          | YES         | YES        |
| MSPI0406S00720842 | chr15 | NM_001042581            | SNUPN              | 0.0000  | 1.99      | 2.06           | 0.08           | YES         | -          |
| MSPI0406S00723766 | chr15 | NM_032246               | MEX3B              | 0.0001  | 1.58      | 2.23           | 0.65           | YES         | YES        |
| MSPI0406S00730480 | chr15 | NM_183376               | ARRDC4             | 0.0002  | 1.62      | 2.48           | 0.86           | YES         | YES        |
| MSPI0406S00731394 | chr15 | NM_152449               | LYSMD4             | 0.0003  | 1.55      | -0.22          | -1.77          | YES         | YES        |
| MSPI0406S00735266 | chr16 | NM_001037125            | UNKL               | 0.0000  | 1.50      | 1.42           | -0.09          | YES         | -          |
| MSPI0406S00735606 | chr16 | AB037847                | CRAMP1L            | 0.0000  | 1.94      | 0.68           | -1.27          | -           | -          |
| MSPI0406S00736080 | chr16 | NM_001099456            | NPW                | 0.0004  | 1.53      | 1.00           | -0.53          | YES         | -          |
| MSPI0406S00743447 | chr16 | NM_002094               | GSPT1              | 0.0000  | 1.55      | 1.70           | 0.16           | YES         | -          |
| MSPI0406S00755023 | chr16 | AB002307                | SRCAP              | 0.0003  | 1.97      | -1.52          | -3.48          | -           | -          |
| MSPI0406S00757893 | chr16 | BF436315                | N4BP1              | 0.0001  | 2.10      | 1.94           | -0.16          | -           | -          |
| MSPI0406S00761227 | chr16 | NA                      |                    | 0.0002  | 1.53      | 1.06           | -0.47          | -           | -          |
| MSPI0406S00765085 | chr16 | NM_020457               | THAP11             | 0.0000  | 1.76      | 1.30           | -0.46          | YES         | -          |
| MSPI0406S00773420 | chr16 | NM_001537               | HSBP1              | 0.0002  | 1.69      | 1.60           | -0.09          | -           | -          |
| MSPI0406S00773421 | chr16 | NM_001537               | HSBP1              | 0.0000  | 2.11      | 1.69           | -0.42          | YES         | YES        |
| MSPI0406S00777575 | chr16 | AA758799                | KLHDC4             | 0.0000  | 1.74      | -0.06          | -1.80          | YES         | -          |
| MSPI0406S00780667 | chr16 | NM_145039               | MGC16385           | 0.0001  | 1.68      | 0.85           | -0.83          | YES         | -          |
| MSPI0406S00813610 | chr17 | NM_000088               | COL1A1             | 0.0004  | 1.50      | 2.57           | 1.07           | -           | -          |
| MSPI0406S00821398 | chr17 | NM_002816               | PSMD12             | 0.0002  | 1.77      | 1.03           | -0.74          | YES         | YES        |
| MSPI0406S00826551 | chr17 | NM_001258               | CDK3               | 0.0000  | 1.53      | -0.73          | -2.26          | YES         | -          |
| MSPI0406S00832779 | chr17 | BC020925                | MGC15523           | 0.0008  | 1.73      | -0.39          | -2.12          | -           | -          |
| MSPI0406S00834302 | chr17 | NM_173620,<br>NM_175902 | FLJ22222,<br>HEXDC | 0.0001  | 1.69      | 1.30           | -0.39          | YES         | -          |
| MSPI0406S00856224 | chr18 | BE676488                | MBP                | 0.0004  | 1.84      | -0.07          | -1.92          | -           | -          |
| MSPI0406S00856242 | chr18 | NA                      |                    | 0.0010  | 1.69      | 0.30           | -1.39          | -           | -          |
| MSPI0406S00865599 | chr19 | NM_015015               | JMJD2B             | 0.0006  | 1.64      | 2.47           | 0.83           | YES         | YES        |
| MSPI0406S00898635 | chr19 | AI275597                | GRLF1              | 0.0000  | 1.91      | 0.54           | -1.38          | -           | -          |
| MSPI0406S00900721 | chr19 | NM_182575               | IZUMO1             | 0.0008  | 1.55      | 2.41           | 0.86           | -           | -          |
| MSPI0406S00906993 | chr19 | NM_017607               | PPP1R12C           | 0.0000  | 1.87      | 1.86           | -0.01          | YES         | -          |
| MSPI0406S00920699 | chr20 | NA                      |                    | 0.0002  | 1.86      | 0.03           | -1.83          | -           | -          |
| MSPI0406S00943034 | chr21 | NM_001186               | BACH1              | 0.0000  | 1.80      | 0.69           | -1.11          | YES         | YES        |
| MSPI0406S00957389 | chr22 | NM_153334               | SCARF2             | 0.0001  | 1.62      | 1.11           | -0.51          | -           | -          |
| MSPI0406S00959645 | chr22 | NA                      |                    | 0.0000  | 1.89      | 0.14           | -1.75          | -           | -          |
| MSPI0406S00967178 | chr22 | NM_001003681            | HMG2L1             | 0.0003  | 1.57      | -1.02          | -2.59          | YES         | YES        |
| MSPI0406S00973723 | chr22 | NM_033318               | C22orf32           | 0.0000  | 1.71      | 1.86           | 0.15           | -           | -          |
| MSPI0406S00990002 | chrX  | NM_031892               | SH3KBP1            | 0.0000  | 1.95      | 2.33           | 0.38           | YES         | -          |

**Figure S1. Validation of HELP methylation levels by MassARRAY Epityper**

Dot plot showing correlation between  $\log_2$  (HpaII/MspI) ratios (x-axis) and percentage of methylation as determined by MassARRAY Epityper (y-axis) for 15 probe sets in 13 randomly selected *EVII* AML patients. The correlation coefficient is shown.

**Figure S2. *EVII* AML patients have a distinct genome-wide methylation profile compared to other recurrent molecular and cytogenetic AML cases**

The correlation plot shows the Pearson correlation of the high variance probe set methylation levels between 344 AML patients. The 16 clusters that were defined by Figueroa et al<sup>1</sup>, are labeled accordingly and the most recurrent cytogenetic or molecular abnormalities, are shown. Clusters #2 and #8, have been identified as AML subgroups with unique methylation signatures, without common genetic or cytogenetic abnormalities and contain the majority of *EVII*+ patients (labeled red for *EVII*+ and green for *EVII*-).

**Figure S3. EVI1 binds hypermethylated genes containing EVI1 binding sequences**

Quantitative PCR of chromatin immunoprecipitation in the *EVII* positive (*EVII*+) SB1960CB cell line (A) and the K562 cell line (B) and the *EVII* negative (*EVII*-) MOLM13 cell line using EVI1 and IgG antibody. Percentage of amount of input material is shown. The mean of two independent experiments is shown. The EVI1 binding sequence present in the promoter region of the hypermethylated genes is depicted.

**Figure S4. DNMT3A overexpressed in *EVII* AMLs**

A gene expression correlation view of 285 AMLs as previously described<sup>2</sup> shows the expression of *DNMT3A* in bars per patient. Focusing on the clusters highly over-represented with *EVII* AMLs a trend for *DNMT3A* overexpression is seen.

**Figure S5. Unsupervised hierarchical clustering using genome wide methylation levels in *EVII* AMLs revealed two main clusters**

Unsupervised cluster analysis using Pearson's correlation with Ward's method revealed two distinct *EVII* subclusters; A and B. Using 10,000 bootstraps the Approximately Unbiased (AU) and Bootstrap Probability (BP) percentages were calculated per tree in the hierarchical clustering to show the tightness per subcluster, i.e. higher percentage means tighter cluster.

REFERENCES

1. Figueroa ME, Lugthart S, Li Y, et al. DNA Methylation Signatures Identify Biologically Distinct Subtypes in Acute Myeloid Leukemia. *Cancer Cell*.
2. Valk PJ, Verhaak RG, Beijen MA, et al. Prognostically useful gene-expression profiles in acute myeloid leukemia. *N Engl J Med*. 2004;350:1617–1628.

Figure S1

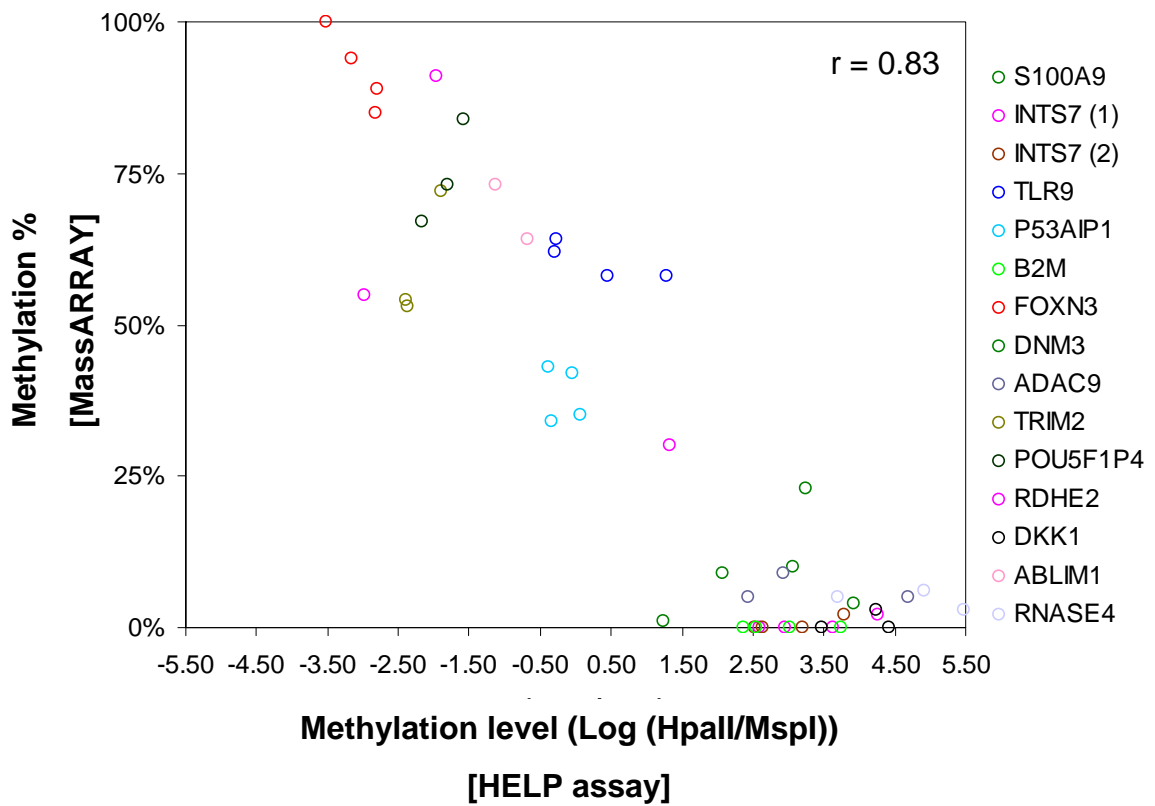

Figure S2

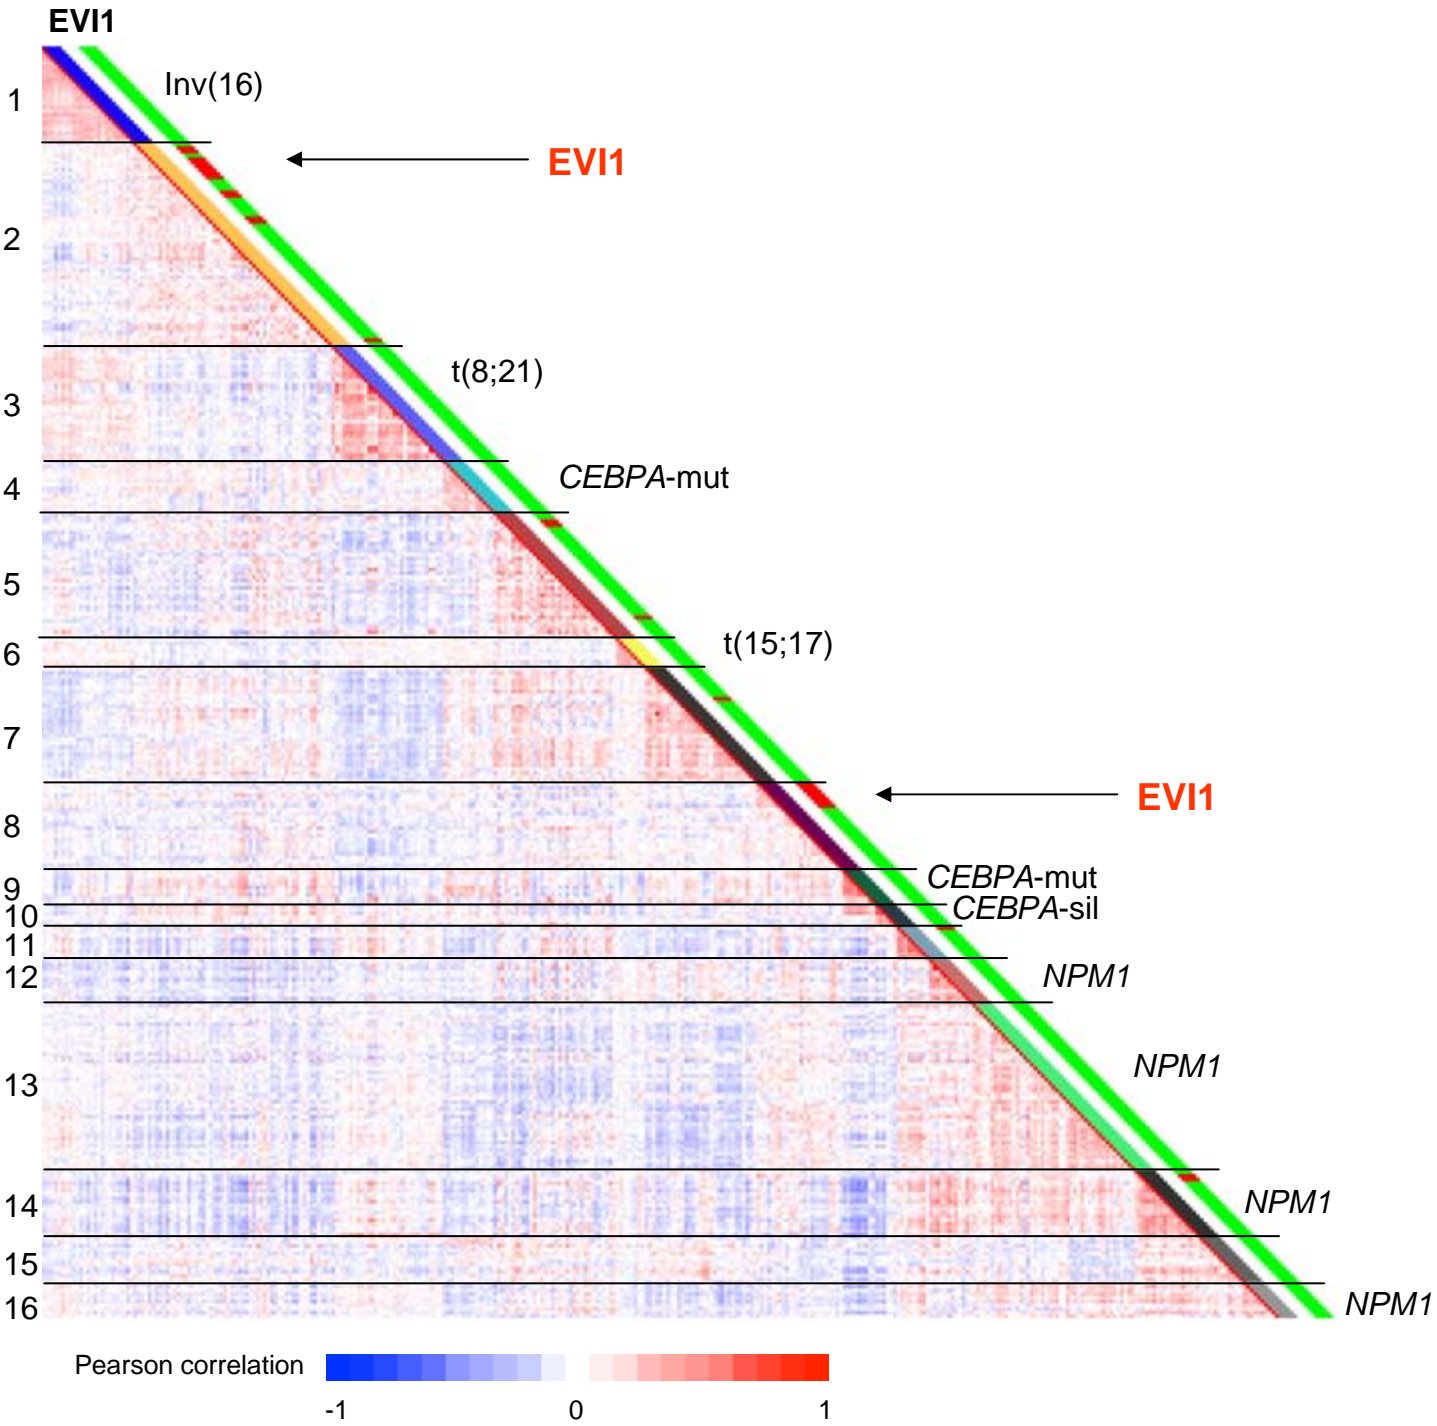

**Figure S3**

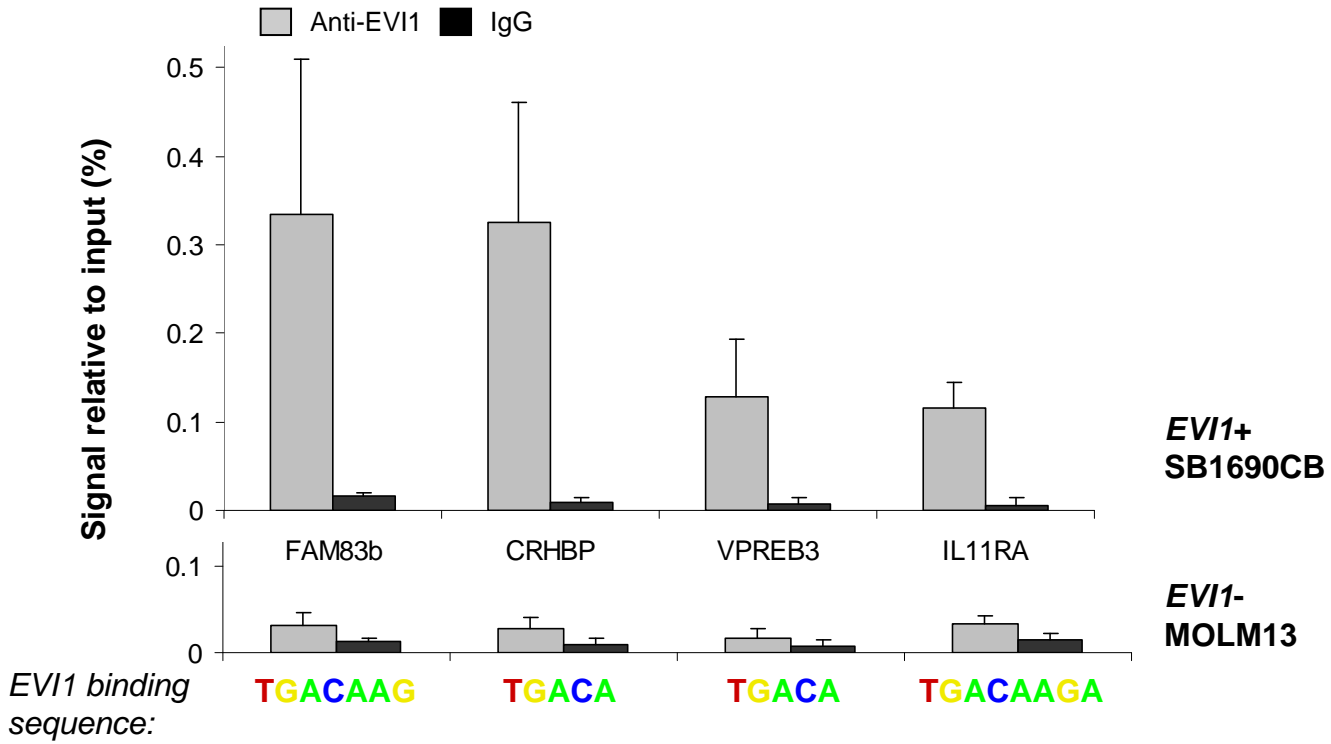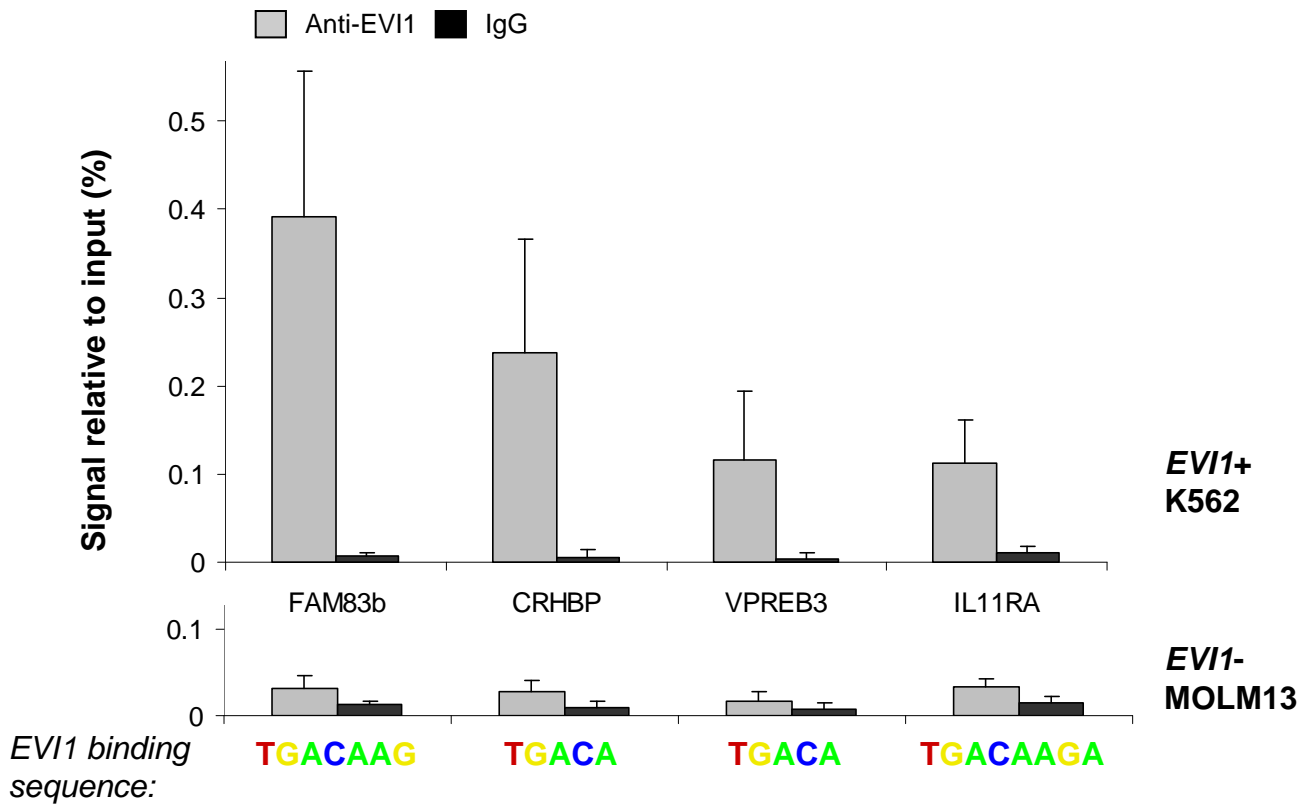



Figure S4

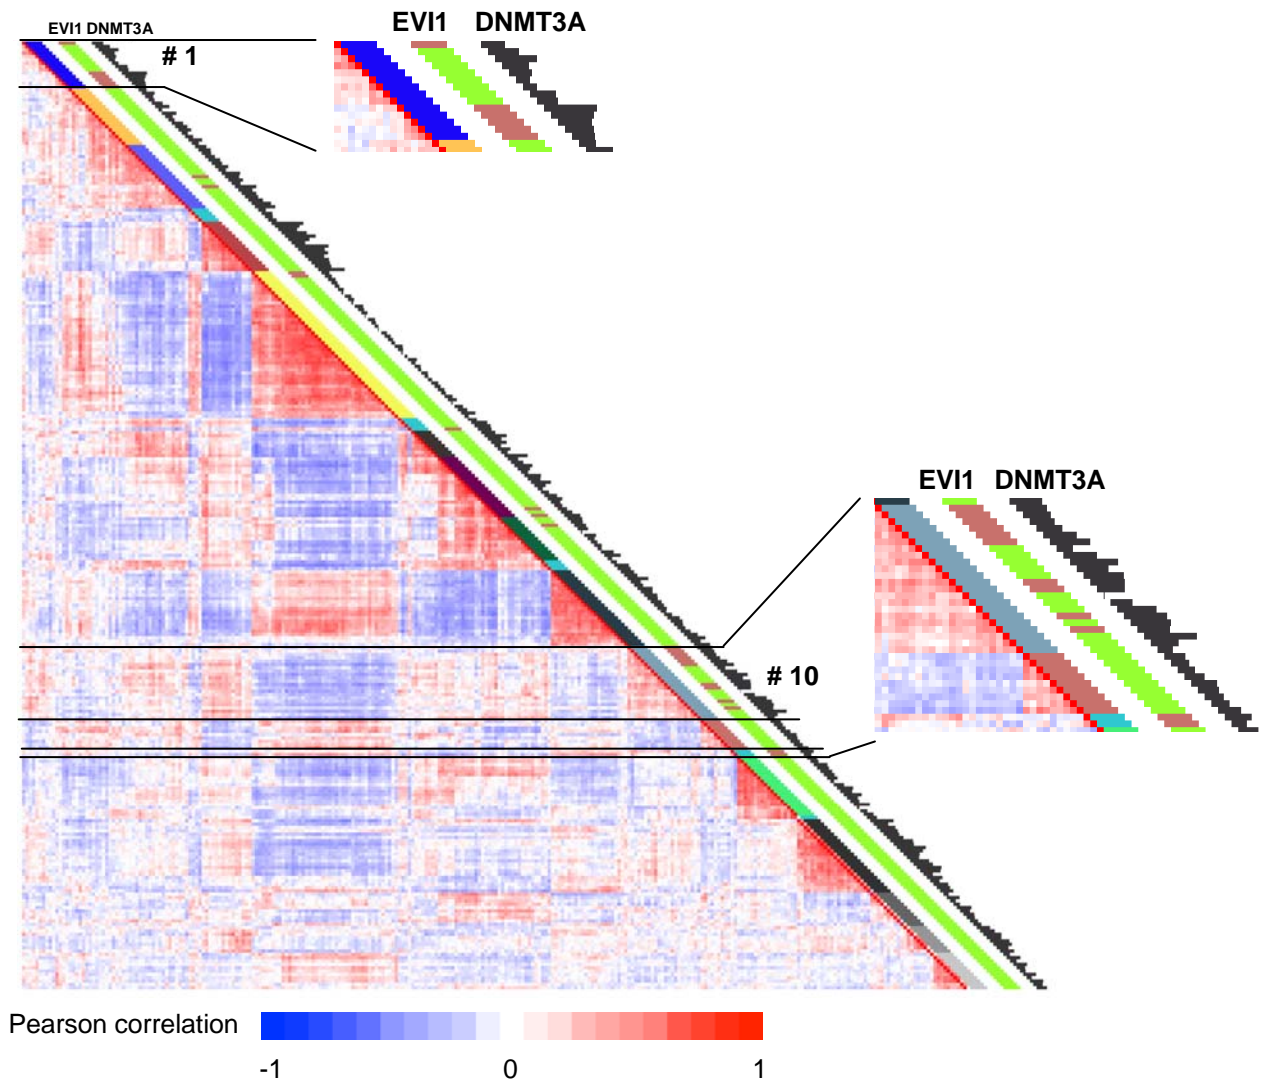

Supplement: blood-2010-04-281337_1.pdf [file blood-2010-04-281337_1.pdf]
